# Supplementary material
Source: HighWire-hosted journal article supplement (https://emboj.embopress.org/content/embj.201694058/F5)

Figure 5D

H3K27Me3

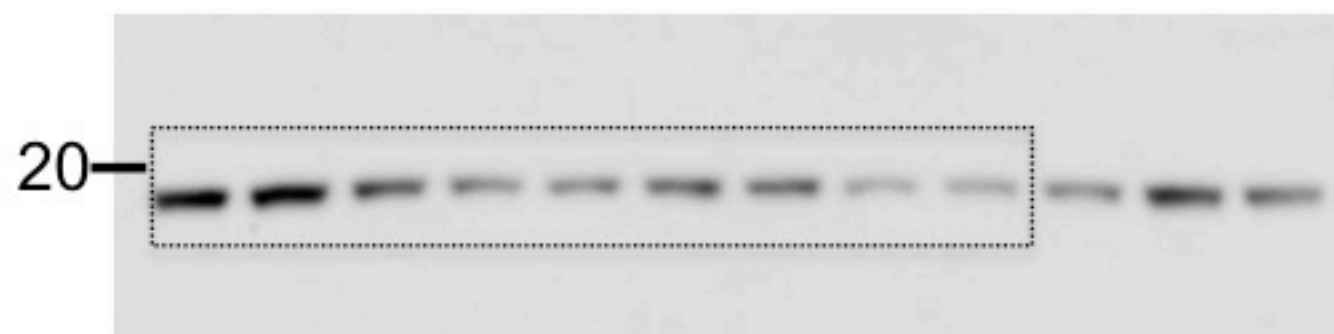

H3 Histone

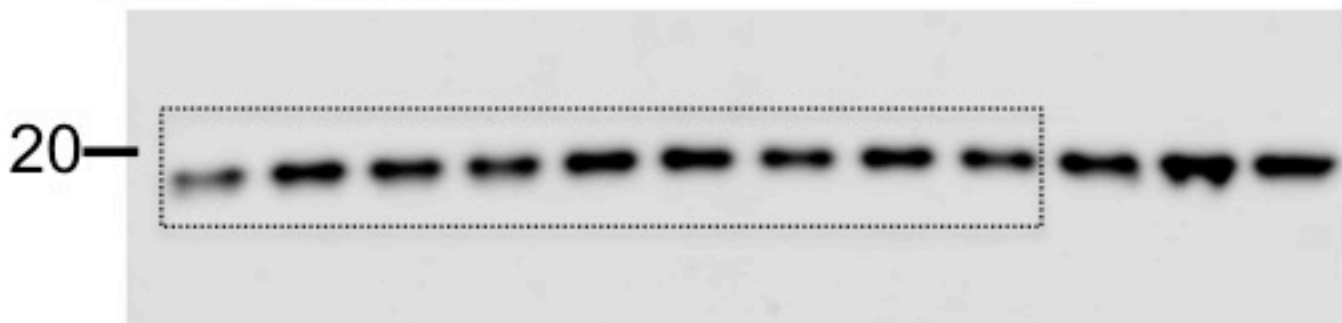

Figure 5G

EZH2

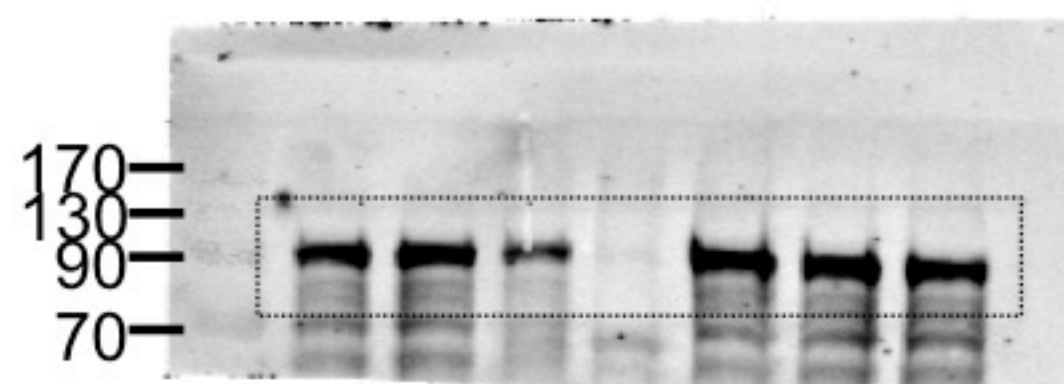

SUZ-12

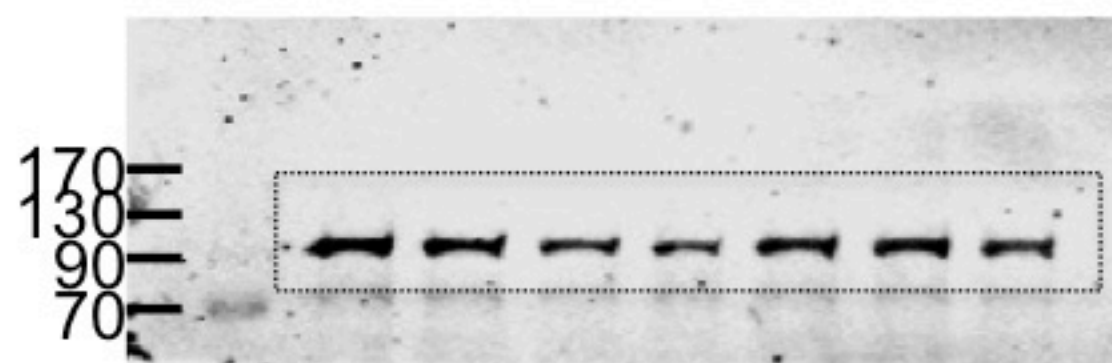

Figure 5E

EZH2

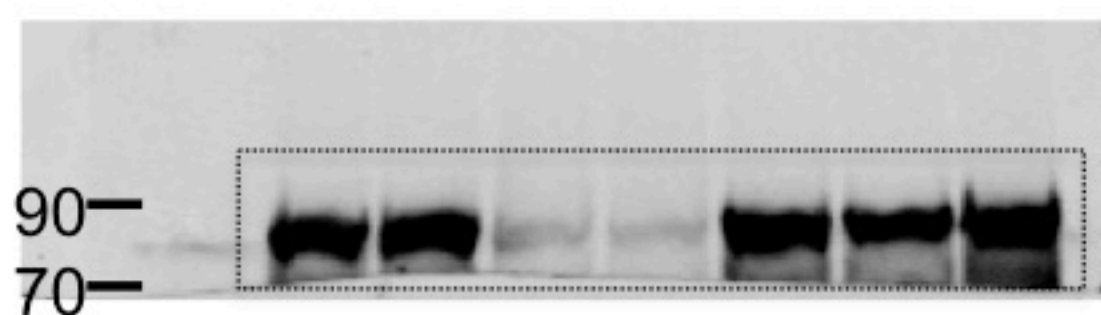

SUZ-12

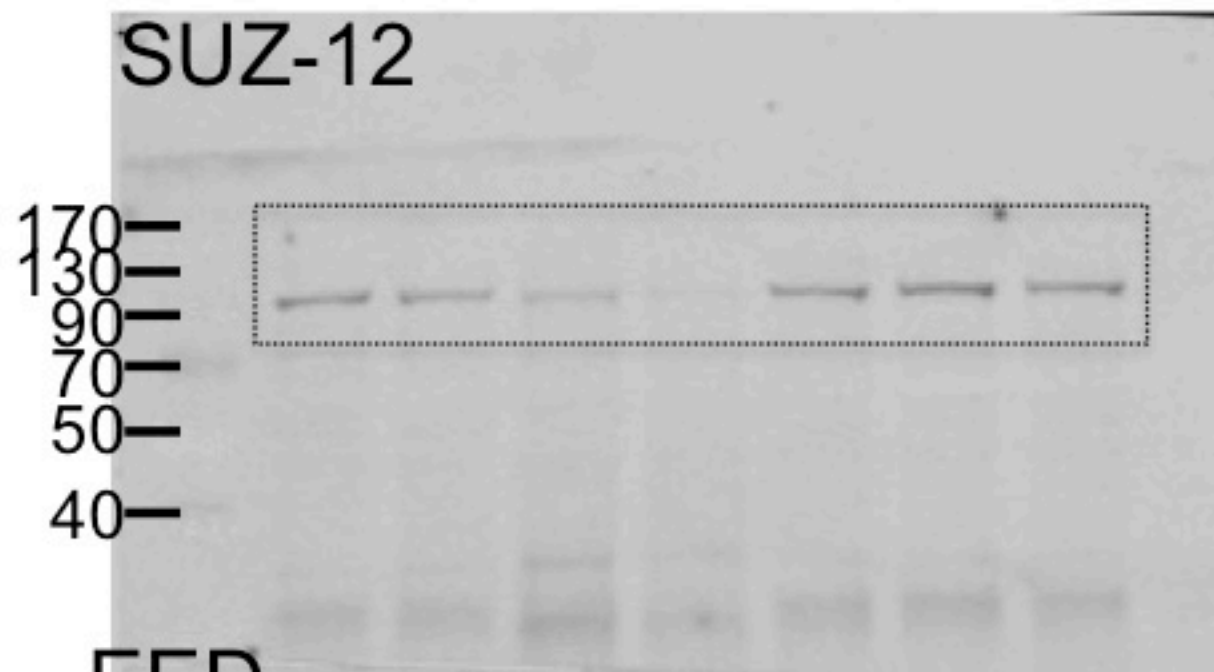

EED

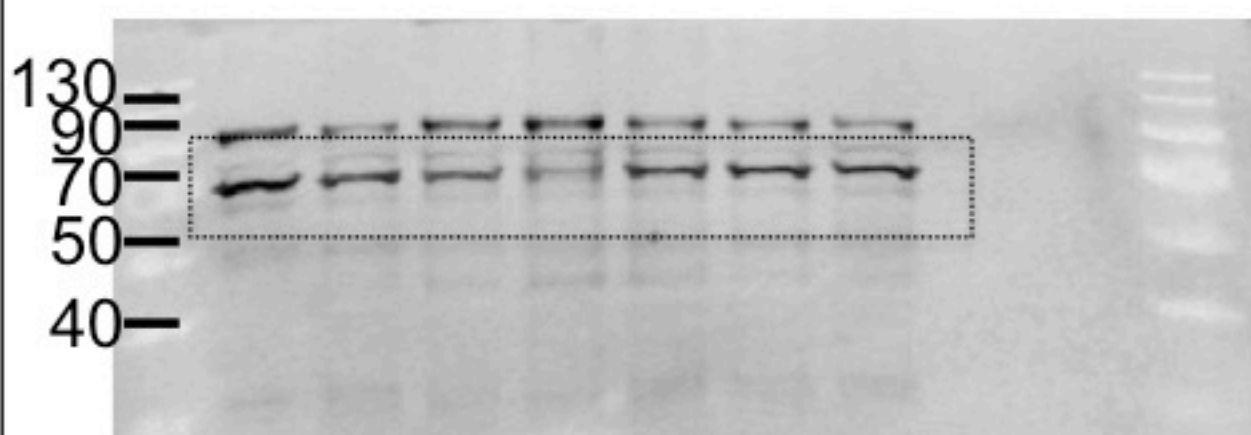

Tubulin

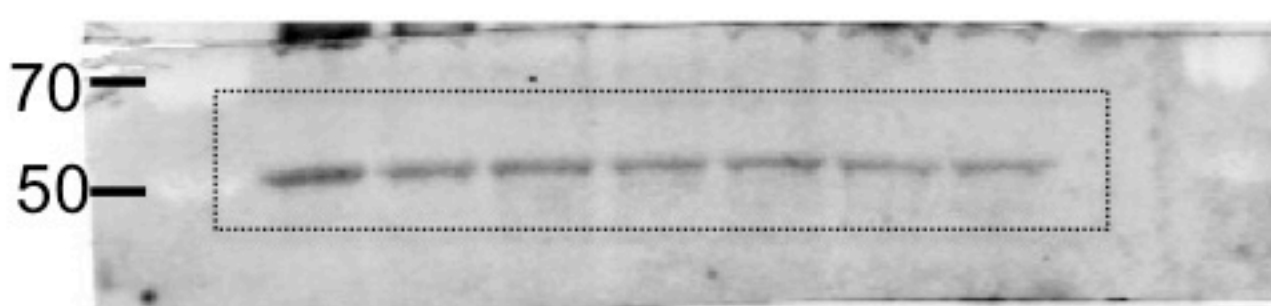

EED

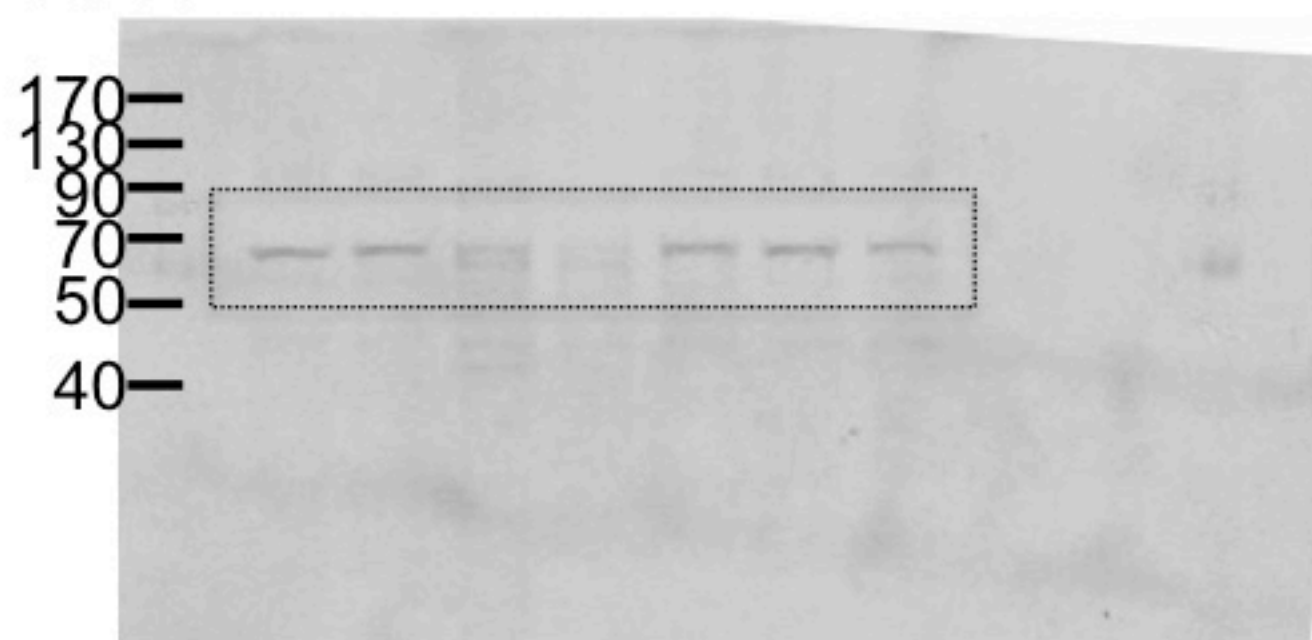

Tubulin

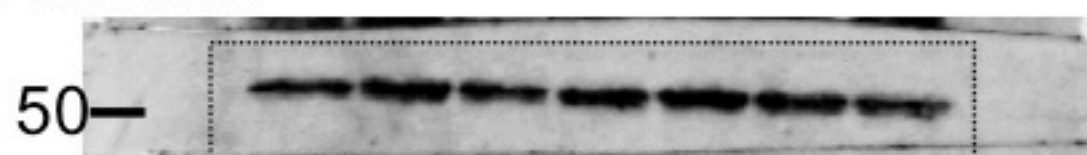

Supplement: inline-supplementary-material-5 [file inline-supplementary-material-5.pdf]
